# Supplementary material for: Balancing Energy Budget in a Central-Place Forager: Which Habitat to Select in a Heterogeneous Environment?
Source: PubMed Central journal article supplement (PMC4100874; doi:10.1371/journal.pone.0102162), 2014-07-16
Supplement: pone.0102162.s003.pdf [file pone.0102162.s003.pdf]

Table S1. Characteristics of individual Ring-billed gulls tracked during the study.

| Gull ID | Sex    | Year | Date marking | Breeding stage | Time to return to nest (min) | Tracking duration (h) | Nb trips | Total nb locations | Nb locations used |
|---------|--------|------|--------------|----------------|------------------------------|-----------------------|----------|--------------------|-------------------|
| 1       | Male   | 2009 | 01-Jun       | Brood rearing  | 60                           | 30.8                  | 4        | 460                | 168               |
| 2       | Male   | 2009 | 08-Jun       | Brood rearing  | 648                          | 31.0                  | 2        | 467                | 208               |
| 3       | Female | 2009 | 08-Jun       | Brood rearing  | 4                            | 8.0                   | 1        | 123                | 31                |
| 4       | Female | 2009 | 08-Jun       | Incubation     | 196                          | 27.3                  | 2        | 410                | 133               |
| 5       | Male   | 2009 | 12-Jun       | Brood rearing  | 52                           | 30.0                  | 4        | 445                | 262               |
| 6       | Male   | 2009 | 12-Jun       | Incubation     | 52                           | 33.0                  | 2        | 497                | 98                |
| 7       | Male   | 2009 | 15-Jun       | Brood rearing  | 1                            | 31.0                  | 3        | 462                | 153               |
| 8       | Female | 2009 | 17-Jun       | Brood rearing  | 1                            | 33.0                  | 4        | 488                | 225               |
| 9       | Female | 2009 | 17-Jun       | Brood rearing  | 1                            | 33.0                  | 4        | 492                | 208               |
| 10      | Male   | 2009 | 19-Jun       | Brood rearing  | 4                            | 31.0                  | 4        | 455                | 177               |
| 11      | Female | 2009 | 19-Jun       | Brood rearing  | 9                            | 31.5                  | 2        | 472                | 114               |
| 12      | Male   | 2009 | 23-Jun       | Brood rearing  | 1                            | 32.5                  | 5        | 485                | 238               |
| 13      | Female | 2010 | 26-Apr       | Incubation     | 1                            | 32.5                  | 1        | 487                | 73                |
| 14      | Male   | 2010 | 26-Apr       | Incubation     | 851                          | 32.5                  | 2        | 485                | 106               |
| 15      | Male   | 2010 | 26-Apr       | Incubation     | 289                          | 31.8                  | 1        | 477                | 57                |
| 16      | Male   | 2010 | 26-Apr       | Incubation     | 1                            | 30.0                  | 2        | 448                | 45                |
| 17      | Male   | 2010 | 26-Apr       | Incubation     | 33                           | 31.5                  | 2        | 475                | 56                |
| 18      | Female | 2010 | 26-Apr       | Incubation     | 88                           | 33.8                  | 2        | 507                | 75                |
| 19      | Male   | 2010 | 28-Apr       | Incubation     | 9                            | 36.5                  | 2        | 548                | 46                |
| 20      | Female | 2010 | 28-Apr       | Incubation     | 32                           | 31.0                  | 1        | 466                | 116               |
| 21      | Female | 2010 | 28-Apr       | Incubation     | 1                            | 33.3                  | 4        | 1006               | 240               |
| 22      | Male   | 2010 | 28-Apr       | Incubation     | 1                            | 33.3                  | 3        | 501                | 136               |
| 23      | Male   | 2010 | 28-Apr       | Incubation     | 1                            | 32.0                  | 2        | 483                | 101               |
| 24      | Male   | 2010 | 28-Apr       | Incubation     | 62                           | 31.8                  | 1        | 474                | 27                |
| 25      | Male   | 2010 | 28-Apr       | Incubation     | 1                            | 26.0                  | 1        | 1006               | 118               |
| 26      | Female | 2010 | 30-Apr       | Incubation     | 204                          | 32.5                  | 2        | 456                | 140               |
| 27      | Male   | 2010 | 30-Apr       | Incubation     | 1                            | 32.3                  | 2        | 485                | 78                |
| 28      | Male   | 2010 | 30-Apr       | Incubation     | 25                           | 33.0                  | 4        | 493                | 125               |
| 29      | Male   | 2010 | 30-Apr       | Incubation     | 21                           | 34.0                  | 4        | 508                | 70                |
| 30      | Male   | 2010 | 30-Apr       | Incubation     | 8                            | 31.5                  | 4        | 474                | 152               |
| 31      | Male   | 2010 | 30-Apr       | Incubation     | 3                            | 31.3                  | 3        | 451                | 117               |
| 32      | Female | 2010 | 30-Apr       | Incubation     | 15                           | 32.5                  | 2        | 490                | 130               |
| 33      | Female | 2010 | 01-May       | Incubation     | 12                           | 68.7                  | 9        | 1044               | 226               |
| 34      | Male   | 2010 | 01-May       | Incubation     | 77                           | 30.5                  | 2        | 1021               | 140               |
| 35      | Male   | 2010 | 01-May       | Incubation     | 689                          | 24.0                  | 3        | 335                | 65                |
| 36      | Male   | 2010 | 01-May       | Incubation     | 20                           | 33.0                  | 3        | 523                | 37                |
| 37      | Female | 2010 | 03-May       | Incubation     | 44                           | 33.3                  | 3        | 498                | 85                |
| 38      | Female | 2010 | 03-May       | Incubation     | 1                            | 34.0                  | 2        | 700                | 85                |
| 39      | Male   | 2010 | 03-May       | Incubation     | 4                            | 34.5                  | 2        | 458                | 110               |
| 40      | Male   | 2010 | 03-May       | Incubation     | 8                            | 32.3                  | 1        | 486                | 74                |
| 41      | Female | 2010 | 04-May       | Incubation     | 8                            | 31.0                  | 2        | 466                | 21                |
| 42      | Male   | 2010 | 04-May       | Incubation     | 4                            | 29.0                  | 2        | 434                | 36                |
| 43      | Female | 2010 | 04-May       | Incubation     | 1                            | 30.5                  | 3        | 461                | 118               |
| 44      | Male   | 2010 | 05-May       | Incubation     | 64                           | 31.7                  | 1        | 468                | 38                |
| 45      | Male   | 2010 | 05-May       | Incubation     | 20                           | 30.8                  | 3        | 463                | 86                |
| 46      | Male   | 2010 | 05-May       | Incubation     | 12                           | 34.5                  | 2        | 515                | 66                |
| 47      | Male   | 2010 | 05-May       | Incubation     | 1                            | 24.5                  | 1        | 367                | 41                |

Table S1. Characteristics of individual Ring-billed gulls tracked during the study.

| Gull ID | Sex    | Year | Date marking | Breeding stage | Time to return to nest (min) | Tracking duration (h) | Nb trips | Total nb locations | Nb locations used |
|---------|--------|------|--------------|----------------|------------------------------|-----------------------|----------|--------------------|-------------------|
| 48      | Male   | 2010 | 05-May       | Incubation     | 69                           | 29.5                  | 2        | 445                | 116               |
| 49      | Male   | 2010 | 07-May       | Incubation     | 51                           | 33.5                  | 2        | 502                | 54                |
| 50      | Female | 2010 | 07-May       | Incubation     | 52                           | 34.3                  | 2        | 517                | 146               |
| 51      | Male   | 2010 | 07-May       | Incubation     | 9                            | 66.0                  | 5        | 994                | 270               |
| 52      | Female | 2010 | 10-May       | Incubation     | 4                            | 34.0                  | 2        | 511                | 138               |
| 53      | Female | 2010 | 10-May       | Incubation     | 76                           | 32.5                  | 3        | 489                | 100               |
| 54      | Male   | 2010 | 10-May       | Incubation     | 4                            | 32.8                  | 2        | 490                | 125               |
| 55      | Male   | 2010 | 10-May       | Incubation     | 16                           | 22.0                  | 3        | 332                | 54                |
| 56      | Male   | 2010 | 10-May       | Incubation     | 68                           | 43.3                  | 3        | 649                | 156               |
| 57      | Male   | 2010 | 11-May       | Incubation     | 11                           | 31.5                  | 1        | 473                | 14                |
| 58      | Male   | 2010 | 11-May       | Incubation     | 1                            | 32.0                  | 3        | 478                | 179               |
| 59      | Female | 2010 | 11-May       | Incubation     | 1                            | 27.0                  | 3        | 406                | 81                |
| 60      | Male   | 2010 | 13-May       | Incubation     | 24                           | 31.5                  | 3        | 475                | 44                |
| 61      | Female | 2010 | 13-May       | Incubation     | 40                           | 35.5                  | 4        | 530                | 85                |
| 62      | Female | 2010 | 13-May       | Incubation     | 384                          | 30.3                  | 2        | 456                | 81                |
| 63      | Male   | 2010 | 13-May       | Incubation     | 13                           | 62.5                  | 6        | 951                | 139               |
| 64      | Male   | 2010 | 16-May       | Incubation     | 24                           | 65.3                  | 4        | 981                | 142               |
| 65      | Male   | 2010 | 16-May       | Incubation     | 13                           | 34.0                  | 6        | 513                | 70                |
| 66      | Female | 2010 | 16-May       | Incubation     | 24                           | 31.0                  | 3        | 468                | 30                |
| 67      | Male   | 2010 | 18-May       | Incubation     | 160                          | 20.5                  | 1        | 308                | 25                |
| 68      | Male   | 2010 | 18-May       | Brood rearing  | 1                            | 31.0                  | 4        | 494                | 105               |
| 69      | Male   | 2010 | 18-May       | Brood rearing  | 24                           | 31.0                  | 6        | 466                | 118               |
| 70      | Female | 2010 | 18-May       | Brood rearing  | 24                           | 33.5                  | 5        | 508                | 121               |
| 71      | Female | 2010 | 18-May       | Brood rearing  | 200                          | 31.5                  | 6        | 471                | 211               |
| 72      | Female | 2010 | 20-May       | Incubation     | 1                            | 36.0                  | 3        | 544                | 148               |
| 73      | Male   | 2010 | 20-May       | Brood rearing  | 17                           | 65.0                  | 9        | 973                | 97                |
| 74      | Male   | 2010 | 20-May       | Brood rearing  | 20                           | 35.0                  | 4        | 522                | 149               |
| 75      | Male   | 2010 | 20-May       | Brood rearing  | 4                            | 31.3                  | 5        | 469                | 125               |
| 76      | Female | 2010 | 21-May       | Incubation     | 1                            | 9.3                   | 1        | 141                | 27                |
| 77      | Male   | 2010 | 23-May       | Brood rearing  | 60                           | 63.0                  | 4        | 945                | 151               |
| 78      | Female | 2010 | 23-May       | Brood rearing  | 20                           | 68.3                  | 9        | 1027               | 305               |
| 79      | Male   | 2010 | 23-May       | Brood rearing  | 1                            | 67.5                  | 10       | 1009               | 357               |
| 80      | Male   | 2010 | 23-May       | Brood rearing  | 3                            | 54.5                  | 6        | 968                | 206               |
| 81      | Female | 2010 | 23-May       | Brood rearing  | 1                            | 63.0                  | 7        | 948                | 248               |
| 82      | Male   | 2010 | 23-May       | Brood rearing  | 1                            | 64.8                  | 9        | 972                | 176               |
| 83      | Male   | 2010 | 23-May       | Incubation     | 1                            | 67.5                  | 2        | 1013               | 132               |
| 84      | Male   | 2010 | 23-May       | Brood rearing  | 40                           | 62.0                  | 9        | 934                | 268               |
| 85      | Male   | 2010 | 26-May       | Brood rearing  | 280                          | 53.8                  | 1        | 800                | 187               |
| 86      | Male   | 2010 | 26-May       | Brood rearing  | 120                          | 63.3                  | 4        | 921                | 104               |
| 87      | Male   | 2010 | 26-May       | Brood rearing  | 20                           | 68.0                  | 11       | 1025               | 412               |
| 88      | Male   | 2010 | 26-May       | Brood rearing  | 8                            | 31.5                  | 5        | 472                | 136               |
| 89      | Male   | 2010 | 26-May       | Brood rearing  | 36                           | 58.5                  | 5        | 518                | 219               |
| 90      | Male   | 2010 | 26-May       | Brood rearing  | 24                           | 32.3                  | 5        | 480                | 179               |
| 91      | Male   | 2010 | 28-May       | Brood rearing  | 1                            | 66.3                  | 7        | 994                | 290               |
| 92      | Female | 2010 | 28-May       | Incubation     | 4                            | 65.0                  | 8        | 977                | 353               |
| 93      | Female | 2010 | 28-May       | Brood rearing  | 320                          | 63.7                  | 7        | 954                | 330               |
| 94      | Female | 2010 | 28-May       | Incubation     | 8                            | 33.0                  | 3        | 493                | 84                |

Table S1. Characteristics of individual Ring-billed gulls tracked during the study.

| <b>Gull ID</b> | <b>Sex</b> | <b>Year</b> | <b>Date marking</b> | <b>Breeding stage</b> | <b>Time to return to nest (min)</b> | <b>Tracking duration (h)</b> | <b>Nb trips</b> | <b>Total nb locations</b> | <b>Nb locations used</b> |
|----------------|------------|-------------|---------------------|-----------------------|-------------------------------------|------------------------------|-----------------|---------------------------|--------------------------|
| 95             | Female     | 2010        | 28-May              | Brood rearing         | 4                                   | 32.5                         | 4               | 486                       | 166                      |
| 96             | Female     | 2010        | 28-May              | Brood rearing         | 1                                   | 32.8                         | 4               | 492                       | 175                      |
| 97             | Female     | 2010        | 31-May              | Brood rearing         | 16                                  | 68.0                         | 14              | 1018                      | 370                      |
| 98             | Male       | 2010        | 31-May              | Incubation            | 16                                  | 64.3                         | 5               | 971                       | 338                      |
| 99             | Male       | 2010        | 31-May              | Brood rearing         | 9                                   | 68.5                         | 10              | 1028                      | 401                      |
| 100            | Female     | 2010        | 31-May              | Brood rearing         | 268                                 | 32.7                         | 5               | 492                       | 141                      |
| 101            | Female     | 2010        | 31-May              | Incubation            | 605                                 | 18.0                         | 1               | 248                       | 83                       |
| 102            | Female     | 2010        | 31-May              | Brood rearing         | 1                                   | 32.0                         | 7               | 484                       | 181                      |
| 103            | Male       | 2010        | 31-May              | Brood rearing         | 9                                   | 26.0                         | 2               | 390                       | 86                       |
| 104            | Male       | 2010        | 03-Jun              | Incubation            | 12                                  | 38.8                         | 1               | 581                       | 288                      |
| 105            | Female     | 2010        | 03-Jun              | Brood rearing         | 8                                   | 63.7                         | 12              | 956                       | 307                      |
| 106            | Female     | 2010        | 03-Jun              | Incubation            | 21                                  | 65.0                         | 7               | 974                       | 270                      |
| 107            | Male       | 2010        | 03-Jun              | Incubation            | 20                                  | 32.5                         | 4               | 488                       | 188                      |
| 108            | Male       | 2010        | 03-Jun              | Brood rearing         | 53                                  | 35.5                         | 6               | 531                       | 255                      |
| 109            | Female     | 2010        | 03-Jun              | Brood rearing         | 32                                  | 30.5                         | 4               | 458                       | 133                      |
